# Supplementary material
Source: PubMed Central journal article supplement (PMC7448654)
Supplement: JCM.00360-20-s0001.pdf [file JCM.00360-20-s0001.pdf]

Table S1. Real-time antibiogram-specific Epic appended comments

| Organism                                                                                                                                                | Conditional Rule                                                                          | Antibiotic Comment<br>(auto-appended)                                                                                                                                                                                                                                                                                                                                                                                                                                                                    |
|---------------------------------------------------------------------------------------------------------------------------------------------------------|-------------------------------------------------------------------------------------------|----------------------------------------------------------------------------------------------------------------------------------------------------------------------------------------------------------------------------------------------------------------------------------------------------------------------------------------------------------------------------------------------------------------------------------------------------------------------------------------------------------|
| <p><i>E. coli</i><br/><i>Klebsiella pneumoniae</i><br/><i>Klebsiella oxytoca</i><br/><i>Proteus mirabilis</i><br/><i>Proteus vulgaris</i><br/>group</p> | <p>When isolate is susceptible to ciprofloxacin, TMP-SMX, and ceftriaxone.</p>            | <p>If patient considered eligible to switch to oral therapy (clinically improving and tolerating oral medications), consider switch to po ciprofloxacin. On a case-by-case basis, po TMP-SMX may be considered.</p> <p>If patient is on broad-spectrum antibiotic (carbapenem, piperacillin-tazobactam or cefepime) and not considered eligible to switch to oral therapy, Antimicrobial Stewardship Committee recommends to consider switching to IV ceftriaxone given this isolate is susceptible.</p> |
|                                                                                                                                                         | <p>When isolate is susceptible to ciprofloxacin and ceftriaxone but I or R to TMP-SMX</p> | <p>If patient considered eligible to switch to oral therapy (clinically improving and tolerating oral medications), consider switch to po ciprofloxacin.</p> <p>If patient is on broad-spectrum antibiotic (carbapenem, piperacillin-tazobactam or cefepime) and not considered eligible to switch to oral therapy, Antimicrobial Stewardship Committee recommends to consider switching to IV ceftriaxone given this isolate is susceptible.</p>                                                        |

|  |                                                                                           |                                                                                                                                                                                                                                                                                                                                                                                                                                             |
|--|-------------------------------------------------------------------------------------------|---------------------------------------------------------------------------------------------------------------------------------------------------------------------------------------------------------------------------------------------------------------------------------------------------------------------------------------------------------------------------------------------------------------------------------------------|
|  |                                                                                           |                                                                                                                                                                                                                                                                                                                                                                                                                                             |
|  | <p>When isolate is susceptible to TMP-SMX and Ceftriaxone but I or R to ciprofloxacin</p> | <p>If patient considered eligible to switch to oral therapy (clinically improving and tolerating oral medications), consider switch to po TMP-SMX.</p> <p>If patient is on broad-spectrum antibiotic (carbapenem, piperacillin-tazobactam or cefepime) and not considered eligible to switch to oral therapy, Antimicrobial Stewardship Committee recommends to consider switching to IV ceftriaxone given this isolate is susceptible.</p> |
|  | <p>When isolate is susceptible to ceftriaxone but I or R to ciprofloxacin and TMP-SMX</p> | <p>If patient is on broad-spectrum antibiotic (carbapenem, piperacillin-tazobactam or cefepime) and not considered eligible to switch to oral therapy, Antimicrobial Stewardship Committee recommends to consider switching to IV ceftriaxone given this isolate is susceptible.</p>                                                                                                                                                        |
|  | <p>When isolate is susceptible to ciprofloxacin but I or R to TMP-SMX and ceftriaxone</p> | <p>If patient considered eligible to switch to oral therapy (clinically improving and tolerating oral medications), consider switch to po ciprofloxacin.</p>                                                                                                                                                                                                                                                                                |

|                                                                                                  |                                                                                    |                                                                                                                                                                                                              |
|--------------------------------------------------------------------------------------------------|------------------------------------------------------------------------------------|--------------------------------------------------------------------------------------------------------------------------------------------------------------------------------------------------------------|
|                                                                                                  | When isolate is susceptible to TMP-SMX but I or R to ciprofloxacin and ceftriaxone | If patient considered eligible to switch to oral therapy (clinically improving and tolerating oral medications), consider switch to po TMP-SMX.                                                              |
|                                                                                                  | When isolate is susceptible to ciprofloxacin and TMP-SMX but I or R to ceftriaxone | If patient considered eligible to switch to oral therapy (clinically improving and tolerating oral medications), consider switch to po ciprofloxacin. On a case-by-case basis, po TMP-SMX may be considered. |
| <b>AmpC organisms:</b><br><i>Serratia marcescens</i><br><i>Providencia</i><br><i>Citrobacter</i> | When isolate is susceptible to ciprofloxacin but I or R to TMP-SMX                 | If patient considered eligible to switch to oral therapy (clinically improving and tolerating oral medications), consider switch to po ciprofloxacin.                                                        |

|                                                    |                                                                                                                                          |                                                                                                                                                                                                                     |
|----------------------------------------------------|------------------------------------------------------------------------------------------------------------------------------------------|---------------------------------------------------------------------------------------------------------------------------------------------------------------------------------------------------------------------|
| <b><i>Enterobacter<br/>Morganella morganii</i></b> | When isolate is susceptible to TMP-SMX but I or R to ciprofloxacin                                                                       | If patient considered eligible to switch to oral therapy (clinically improving and tolerating oral medications), consider switch to po TMP-SMX.                                                                     |
|                                                    | When isolate is susceptible to ciprofloxacin and TMP-SMX                                                                                 | If patient considered eligible to switch to oral therapy (clinically improving and tolerating oral medications), consider switch to po ciprofloxacin. On a case-by-case basis, po option TMP-SMX may be considered. |
| <b><i>Pseudomonas<br/>aeruginosa</i></b>           | When at least one of the following antibiotics is susceptible:<br>meropenem,<br>piperacillin-tazobactam,<br>cefepime or<br>ciprofloxacin | Antimicrobial Stewardship Committee recommends that a single antibiotic to which the isolate is susceptible be used in clinically stable patients instead of combination antibiotic therapy.                        |

Table S2. Study features for the pre-intervention and intervention groups

|                         | Pre-intervention                                                                                   | Intervention                                                                                                                                                               |
|-------------------------|----------------------------------------------------------------------------------------------------|----------------------------------------------------------------------------------------------------------------------------------------------------------------------------|
| <b>Time period</b>      | 02/09/2018 - 10/9/2018                                                                             | 11/1/2018 - 7/15/2019                                                                                                                                                      |
| <b>Procedure</b>        | Blood culture positive<br>Gram stain showed GNR<br>Subculture (4-8hrs)<br>AST on Microscan (18hrs) | Blood culture positive<br>Gram stain showed GNR<br>Rapid lysis-centrifugation method (10min)<br>AST on VITEK®2 ( <i>Enterobacterales</i> 9hrs, <i>P. aeruginosa</i> 12hrs) |
| <b>Epic comments</b>    | None                                                                                               | Automated, isolate antibiogram-specific, templated de-escalation comment                                                                                                   |
| <b>ASP intervention</b> | None                                                                                               | ASP review +/- intervention during daytime hours on weekdays                                                                                                               |

ASP: Antibiotic stewardship program; AST: antimicrobial susceptibility testing; GNR: Gram-negative rod; hrs: hours; min: minutes.

Table S3. Definition of antibiotic de-escalation and escalation

| First antibiotic<br>(first column) | Second antibiotic |     |       |          |      |      |         |       |      |      |           |              |          |
|------------------------------------|-------------------|-----|-------|----------|------|------|---------|-------|------|------|-----------|--------------|----------|
|                                    | cefaz             | CTX | cefaz | cefepime | erta | mero | TMP-SMX | cipro | levo | moxi | amox-clav | amp-subactam | pip-tazo |
| cefaz                              | -                 | E   | E     | E        | E    | E    | E       | E     | E    | E    | E         | E            | E        |
| CTX                                | D                 | -   | E     | E        | E    | E    | E       | E     | E    | E    | E         | E            | E        |
| ceftaz                             | D                 | D   | -     | same     | E    | E    | E       | E     | E    | E    | D         | D            | D        |
| cefepime                           | D                 | D   | same  | -        | E    | E    | E       | E     | E    | E    | D         | D            | D        |
| amox-clav                          | D                 | D   | E     | E        | E    | E    | E       | E     | E    | E    | -         | same         | E        |
| amp-sulbactam                      | D                 | D   | E     | E        | E    | E    | E       | E     | E    | E    | same      | -            | E        |
| pip-tazo                           | D                 | D   | D     | D        | E    | E    | D       | D     | D    | D    | D         | D            | -        |
| erta                               | D                 | D   | D     | D        | -    | E    | D       | D     | D    | D    | D         | D            | D        |
| mero                               | D                 | D   | D     | D        | D    | -    | D       | D     | D    | D    | D         | D            | D        |
| TMP-SMX                            | D                 | D   | D     | D        | E    | E    | -       | E     | E    | E    | D         | D            | E        |
| cipro                              | D                 | D   | D     | D        | E    | E    | D       | -     | same | D    | D         | D            | E        |
| levo                               | D                 | D   | D     | D        | E    | E    | D       | same  | -    | D    | D         | D            | E        |
| moxi                               | D                 | D   | D     | D        | E    | E    | D       | E     | E    | -    | D         | D            | E        |

Amox-clav: amoxicillin-clavulanic acid; amp-sulbactam: ampicillin-sulbactam; cefaz: cefazolin; ceftaz: ceftazidime; cipro: ciprofloxacin; CTX: ceftriaxone; D: de-escalation; erta: ertapenem; E: escalation; levo: levofloxacin; mero: meropenem; moxi: moxifloxacin; pip-tazo: piperacillin-tazobactam; TMP-SMX: trimethoprim-sulfamethoxazole.
